# Supplementary material for: Hyperbaric oxygen therapy ameliorates intestinal and systematic inflammation by modulating dysbiosis of the gut microbiota in Crohn’s disease
Source: PubMed Central journal article supplement (PMC11137967; doi:10.1186/s12967-024-05317-1), 2024-05-30

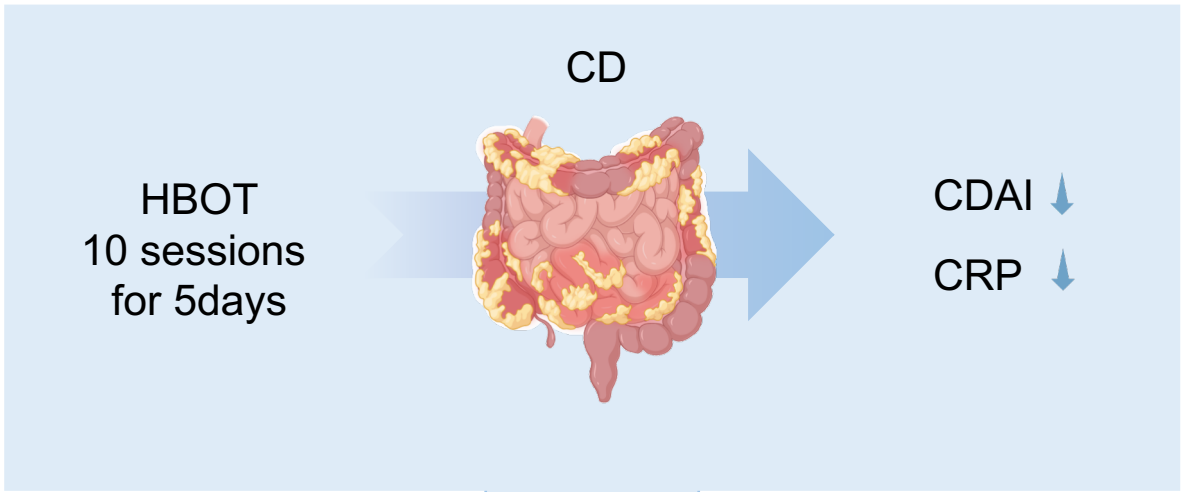

**Microbiota alteration**

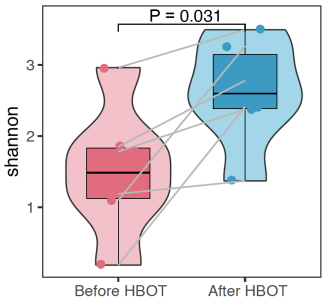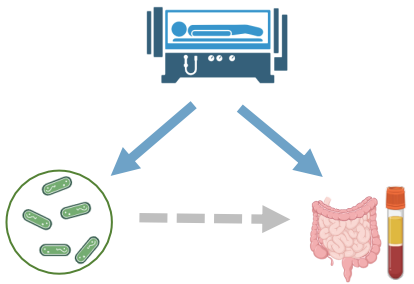

**Omics analysis**

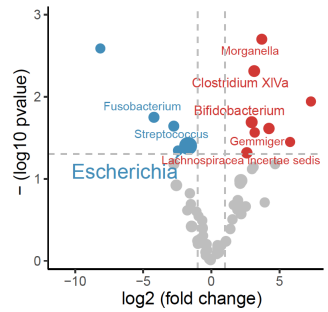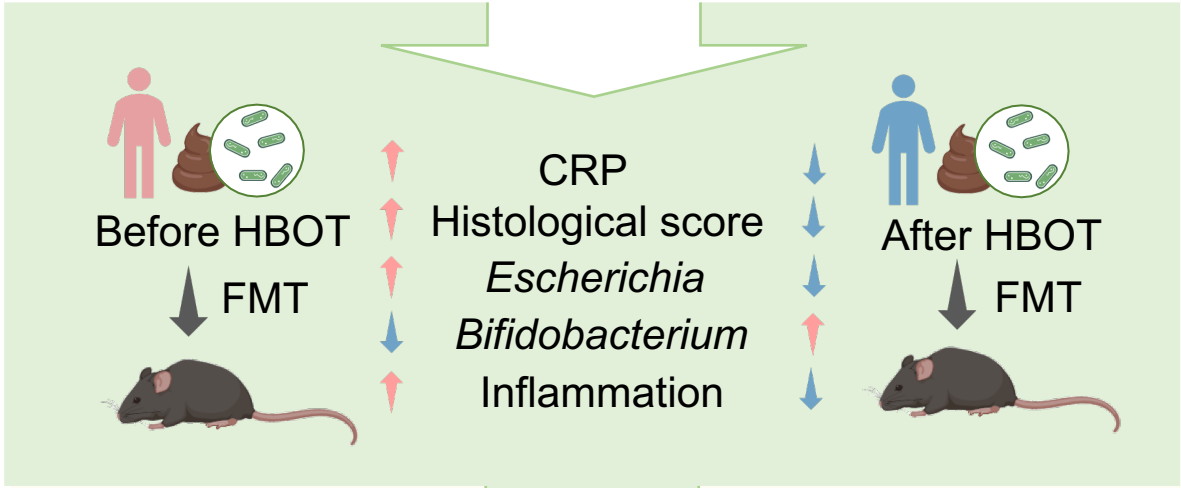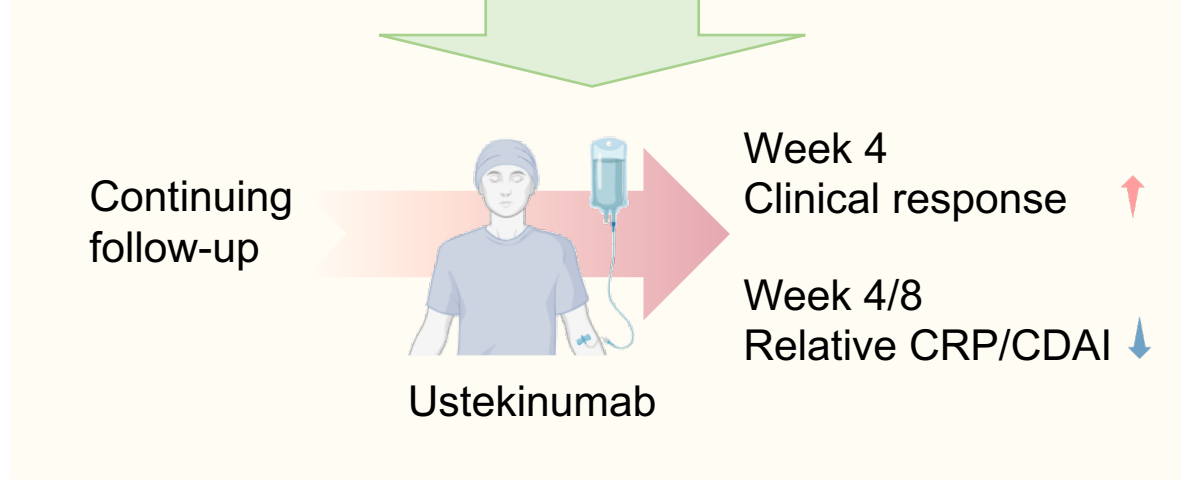

Supplement: 12967_2024_5317_MOESM2_ESM.pdf [file 12967_2024_5317_MOESM2_ESM.pdf]
